# Supplementary material for: Effect of Air Purifier Use in the Classrooms on Indoor Air Quality—Case Study
Source: MDPI journal article supplement (doi:10.3390/atmos12121606), 2021-11-30
Supplement: s1 [file s1]

## Supplementary Materials:

Małgorzata Basińska\*, Michał Michałkiewicz and Katarzyna Ratajczak

**Table S1.** Number of microorganisms (CFU/m<sup>3</sup>) in the classroom 04 in the morning (M) and after lessons (Al)

| Collection<br>microorganisms   | time | and Without purifier |       | With a purifier |       |       |       |      |     |      |      |      |
|--------------------------------|------|----------------------|-------|-----------------|-------|-------|-------|------|-----|------|------|------|
|                                |      | 11                   | 15    | 18              | 20    | 22    | 29    | 6    | 20  | 3    | 10   | 17   |
|                                |      | April                | April | April           | April | April | April | May  | May | June | June | June |
| <i>Staphylococcus</i> M+       | M    | 0                    | ns    | 0               | ns    | 10    | 10    | 0    | 0   | 0    | 10   | 20   |
|                                | Al   | 10                   | 50    | 80              | 110   | 30    | 60    | 130  | 0   | 10   | 10   | 10   |
| <i>Staphylococcus</i> M-       | M    | 0                    | ns    | 0               | ns    | 30    | 10    | 0    | 10  | 70   | 10   | 40   |
|                                | Al   | 1680                 | 760   | 2720            | 300   | 160   | 1020  | 1120 | 50  | 100  | 10   | 20   |
| Mesophilic bacteria            | M    | 20                   | ns    | 60              | ns    | 80    | 190   | 220  | 40  | 120  | 60   | 160  |
|                                | Al   | 2560                 | 1180  | 4400            | 1760  | 1220  | 1800  | 3220 | 180 | 180  | 200  | 1200 |
| Psychrophilic bacteria         | M    | 60                   | ns    | 10              | ns    | 120   | 130   | 100  | 140 | 1040 | 1000 | 340  |
|                                | Al   | 3080                 | 940   | 4800            | 1360  | 680   | 1900  | 3500 | 440 | 3080 | 2240 | 1780 |
| <i>Pseudomonas fluorescens</i> | M    | 0                    | ns    | 0               | ns    | 0     | 0     | 0    | 0   | 0    | 0    | 10   |
|                                | Al   | 10                   | 0     | 0               | 0     | 0     | 0     | 0    | 0   | 0    | 0    | 0    |
| <i>Actinobacteria</i>          | M    | 0                    | ns    | 0               | ns    | 0     | 0     | 0    | 0   | 0    | 0    | 0    |
|                                | Al   | 10                   | 10    | 20              | 40    | 0     | 0     | 0    | 0   | 10   | 0    | 0    |
| Fungi – Waksman                | M    | 140                  | ns    | 110             | ns    | 100   | 30    | 80   | 240 | 470  | 980  | 660  |
|                                | Al   | 400                  | 560   | 580             | 190   | 80    | 180   | 740  | 580 | 3600 | 2380 | 1340 |
| Fungi – Czapek-Doxa            | M    | 40                   | ns    | 60              | ns    | 40    | 30    | 40   | 140 | 510  | 680  | 640  |
|                                | Al   | 200                  | 240   | 400             | 160   | 80    | 80    | 400  | 560 | 4280 | 1780 | 980  |

ns – not studied

**Table S2.** Number of microorganisms (CFU/m<sup>3</sup>) in the classroom 105 in the morning (M) and after lessons (Al)

| Collection<br>microorganisms   | time | and Without purifier |       | With a purifier |       |       |       |      |     |      |      |      |
|--------------------------------|------|----------------------|-------|-----------------|-------|-------|-------|------|-----|------|------|------|
|                                |      | 11                   | 15    | 18              | 20    | 22    | 29    | 6    | 20  | 3    | 10   | 17   |
|                                |      | April                | April | April           | April | April | April | May  | May | June | June | June |
| <i>Staphylococcus</i> M+       | M    | 0                    | ns    | 0               | ns    | 0     | 0     | 0    | 10  | 10   | 20   | 0    |
|                                | Al   | 20                   | 40    | 70              | 50    | 10    | 20    | 30   | 10  | 20   | 20   | 10   |
| <i>Staphylococcus</i> M-       | M    | 20                   | ns    | 10              | ns    | 30    | 10    | 0    | 10  | 30   | 20   | 30   |
|                                | Al   | 2060                 | 370   | 880             | 1320  | 160   | 490   | 140  | 350 | 40   | 30   | 40   |
| Mesophilic bacteria            | M    | 60                   | ns    | 10              | ns    | 50    | 160   | 60   | 60  | 250  | 120  | 40   |
|                                | Al   | 2620                 | 360   | 3680            | 1700  | 1760  | 1140  | 680  | 520 | 100  | 320  | 120  |
| Psychrophilic bacteria         | M    | 80                   | ns    | 10              | ns    | 80    | 90    | 80   | 60  | 1180 | 820  | 140  |
|                                | Al   | 2660                 | 620   | 3320            | 3320  | 1740  | 1320  | 1020 | 660 | 4140 | 2620 | 1460 |
| <i>Pseudomonas fluorescens</i> | M    | 0                    | ns    | 0               | ns    | 0     | 0     | 0    | 0   | 0    | 0    | 20   |
|                                | Al   | 0                    | 0     | 0               | 0     | 0     | 0     | 0    | 0   | 0    | 0    | 10   |
| <i>Actinobacteria</i>          | M    | 0                    | ns    | 0               | ns    | 0     | 0     | 0    | 0   | 0    | 0    | 0    |

|                     |    |     |     |     |     |    |    |     |     |      |      |      |
|---------------------|----|-----|-----|-----|-----|----|----|-----|-----|------|------|------|
|                     | Al | 90  | 30  | 10  | 10  | 10 | 0  | 0   | 0   | 40   | 0    | 0    |
| Fungi – Waksman     | M  | 160 | ns  | 90  | ns  | 60 | 40 | 100 | 160 | 580  | 580  | 340  |
|                     | Al | 460 | 500 | 540 | 200 | 40 | 40 | 280 | 980 | 4220 | 3700 | 1740 |
| Fungi – Czapek-Doxa | M  | 10  | ns  | 20  | ns  | 60 | 20 | 100 | 80  | 700  | 600  | 380  |
|                     | Al | 180 | 260 | 220 | 240 | 60 | 20 | 320 | 740 | 3760 | 2440 | 1480 |

ns – not studied

**Table S3.** Number of microorganisms (CFU/m<sup>3</sup>) in the external environment (research background) in the morning (M) and after lessons (Al)

| Collection microorganisms      | time | and Without purifier |       | With a purifier |       |       |       |     |      |      |        |      |
|--------------------------------|------|----------------------|-------|-----------------|-------|-------|-------|-----|------|------|--------|------|
|                                |      | 11                   | 15    | 18              | 20    | 22    | 29    | 6   | 20   | 3    | 10     | 17   |
|                                |      | April                | April | April           | April | April | April | May | May  | June | June   | June |
| <i>Staphylococcus</i> M+       | M    | 30                   | ns    | 40              | ns    | 0     | 10    | 10  | 40   | 10   | 30     | 0    |
|                                | Al   | 10                   | 70    | 20              | 20    | 10    | 10    | 0   | 50   | 0    | 10     | 10   |
| <i>Staphylococcus</i> M-       | M    | 0                    | ns    | 40              | ns    | 0     | 20    | 0   | 70   | 20   | 20     | 0    |
|                                | Al   | 10                   | 60    | 20              | 10    | 10    | 10    | 20  | 20   | 10   | 10     | 10   |
| Mesophilic bacteria            | M    | 60                   | ns    | 400             | ns    | 80    | 100   | 180 | 360  | 150  | 100    | 380  |
|                                | Al   | 60                   | 60    | 40              | 160   | 80    | 60    | 100 | 400  | 80   | 360    | 40   |
| Psychrophilic bacteria         | M    | 180                  | ns    | 2520            | ns    | 380   | 760   | 440 | 2620 | 3190 | 18,680 | 980  |
|                                | Al   | 280                  | 240   | 2240            | 600   | 480   | 360   | 320 | 1680 | 4960 | 1940   | 2480 |
| <i>Pseudomonas fluorescens</i> | M    | 0                    | ns    | 0               | ns    | 0     | 0     | 0   | 0    | 0    | 0      | 0    |
|                                | Al   | 10                   | 0     | 0               | 10    | 0     | 0     | 0   | 0    | 0    | 0      | 0    |
| <i>Actinobacteria</i>          | M    | 70                   | ns    | 100             | ns    | 40    | 30    | 10  | 20   | 230  | 230    | 0    |
|                                | Al   | 110                  | 280   | 130             | 80    | 30    | 10    | 0   | 10   | 510  | 10     | 0    |
| Fungi – Waksman                | M    | 560                  | ns    | 1440            | ns    | 300   | 560   | 660 | 1840 | 3300 | 12,920 | 1020 |
|                                | Al   | 600                  | 960   | 400             | 320   | 240   | 180   | 520 | 2160 | 6420 | 4780   | 1040 |
| Fungi – Czapek-Doxa            | M    | 360                  | ns    | 540             | ns    | 120   | 360   | 540 | 1740 | 2790 | 12,080 | 1340 |
|                                | Al   | 350                  | 680   | 280             | 320   | 220   | 160   | 240 | 3280 | 4660 | 3940   | 1020 |

ns – not studied
